# Supplementary material
Source: publisher site journal article supplement (https://www.dovepress.com/article/459449)
Supplement: Supplementary file 1 [file get_supplementary_file.php]

**Supplementary Material**

**Table S1. List of primer sequences.**

|  | **Species** | **Forward** | **Reverse** |
| --- | --- | --- | --- |
| PKP2 | human | TGCCGCAGCTACCTTCATACAG | CACAAGCAGCCCGTTGAACATC |
| PKP2 | mice | GGAAGATGATGAGAAGGTGTGATGG | CTGGCTGGTAGTCTGCAATAGTTC |
| occludin | mice | TGGCTATGGAGGCGGCTATGG | ACTAAGGAAGCGATGAAGCAGAAGG |
| AQP5 | mice | CCGTGGTGGTGGAGTTAATCTTGAC | TGTGACCGACAAGCCAATGGATAAG |
| JAM3 | mice | CCATCTATCGCTGTGAGGTCGTTG | GTTGCCGTCTTGCCTACAGGTAC |
| claudin5 | mice | TGGTGCTGTGTCTGGTAGGATGG | GTCACGATGTTGTGGTCCAGGAAG |
| JAM3  AQP5  occludin | human  human  human | TGTGAGGAGCAGGAGATGGAAGTC  TGCCATCCTTTACTTCTACCTG  AACTTCGCCTGTGGATGACTTCAG | GCCAGTACAGCAAGGACAACCAG  CTCATACGTGCCTTTGATGATG  TTTGACCTTCCTGCTCTTCCCTTTG |
| claudin1  TNFα  IL-1β  ZO-1  β-catenin  ptgs2  ve-cadherin  AQP3  connexin43 | human  human  human  human  human  human  human  human  human | TCTTGCAGGTCTGGCTATTTTA  AATGGCGTGGAGCTGAGAGATAAC  CCGACCACCACTACAGCAAGG  GCGGATGGTGCTACAAGTGATG  TGAGGACAAGCCACAAGATTACAAG  GGTTGCTGGTGGTAGGAATGTTC  GTACCACCTCACTGCTGTCATTG  CATTGCGGGTGTCTTCGTGTAC  CTCTCGCCTATGTCTCCTCCTG | TTGGGTAAGAGGTTGTTTTTCG  CGGCTGATGGTGTGGGTGAG  GGGCAGGGAACCAGCATCTTC  GCCTTCTGTGTCTGTGTCTTCATAG  AGCAGTCTCATTCCAAGCCATTG CTGGTATTTCATCTGCCTGCTCTG  CATTGAACAACCGATGCGTGAAC  GCTTCACATTCTCTTCCTCGTTGG  TCACTTGCTTGCTTGTTGTAATTGC |

**2 Results**


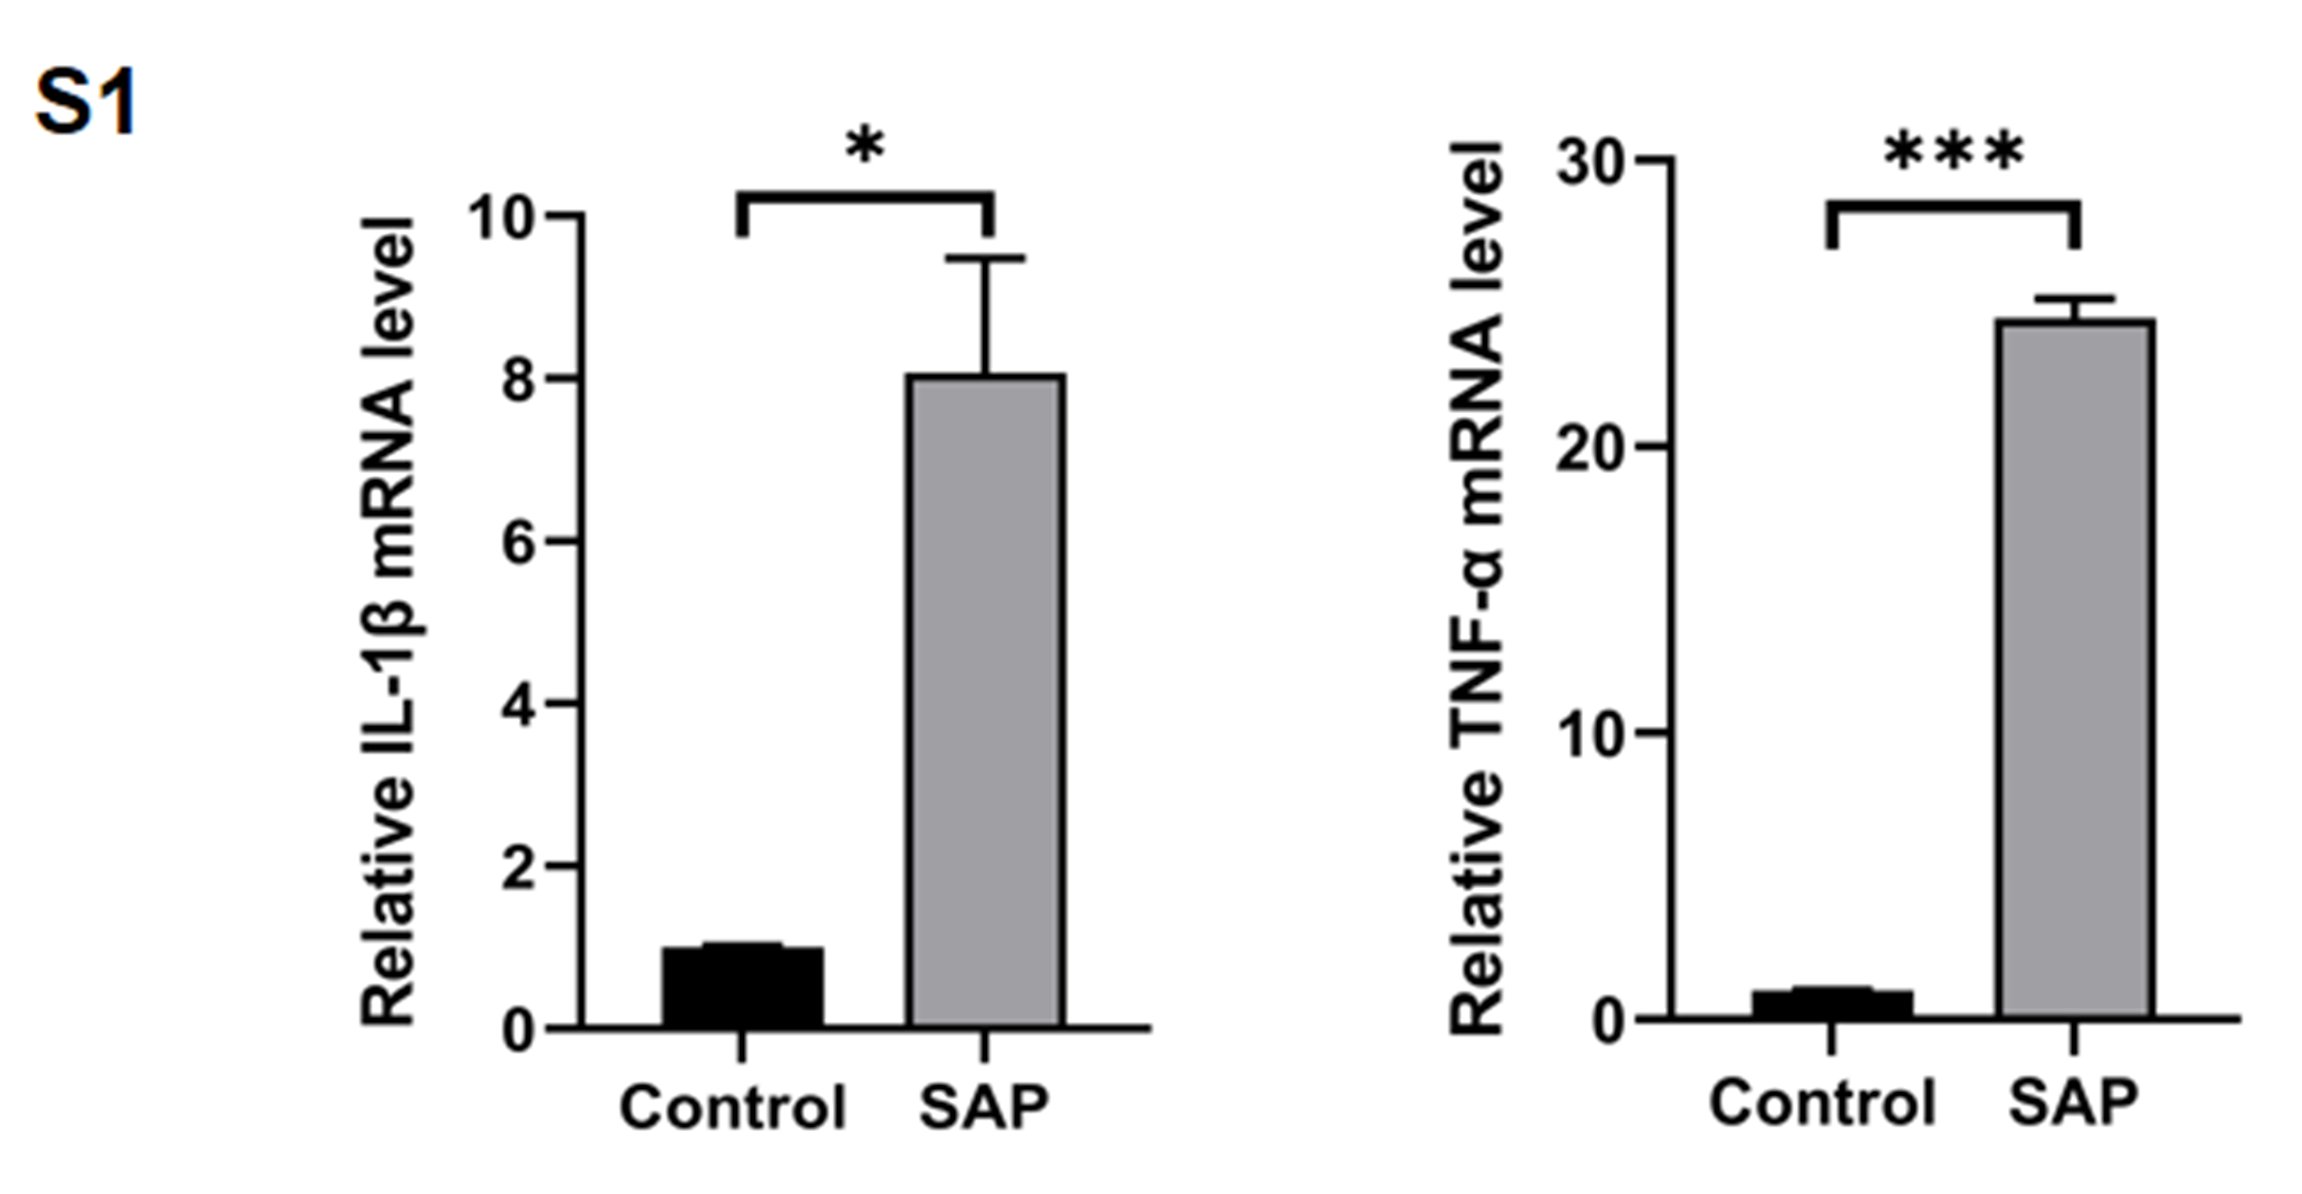


**Figure S1** The pancreas exhibits elevated levels of inflammatory factors. The expression levels of IL-1β and TNF-α mRNA in the pancreas were quantified using qRT-PCR (n = 12/group).There were 6 mice in each group (representative from three independent experiments).*p < 0.05,**p < 0.01,** p < 0.001,**** p <0 .0001.
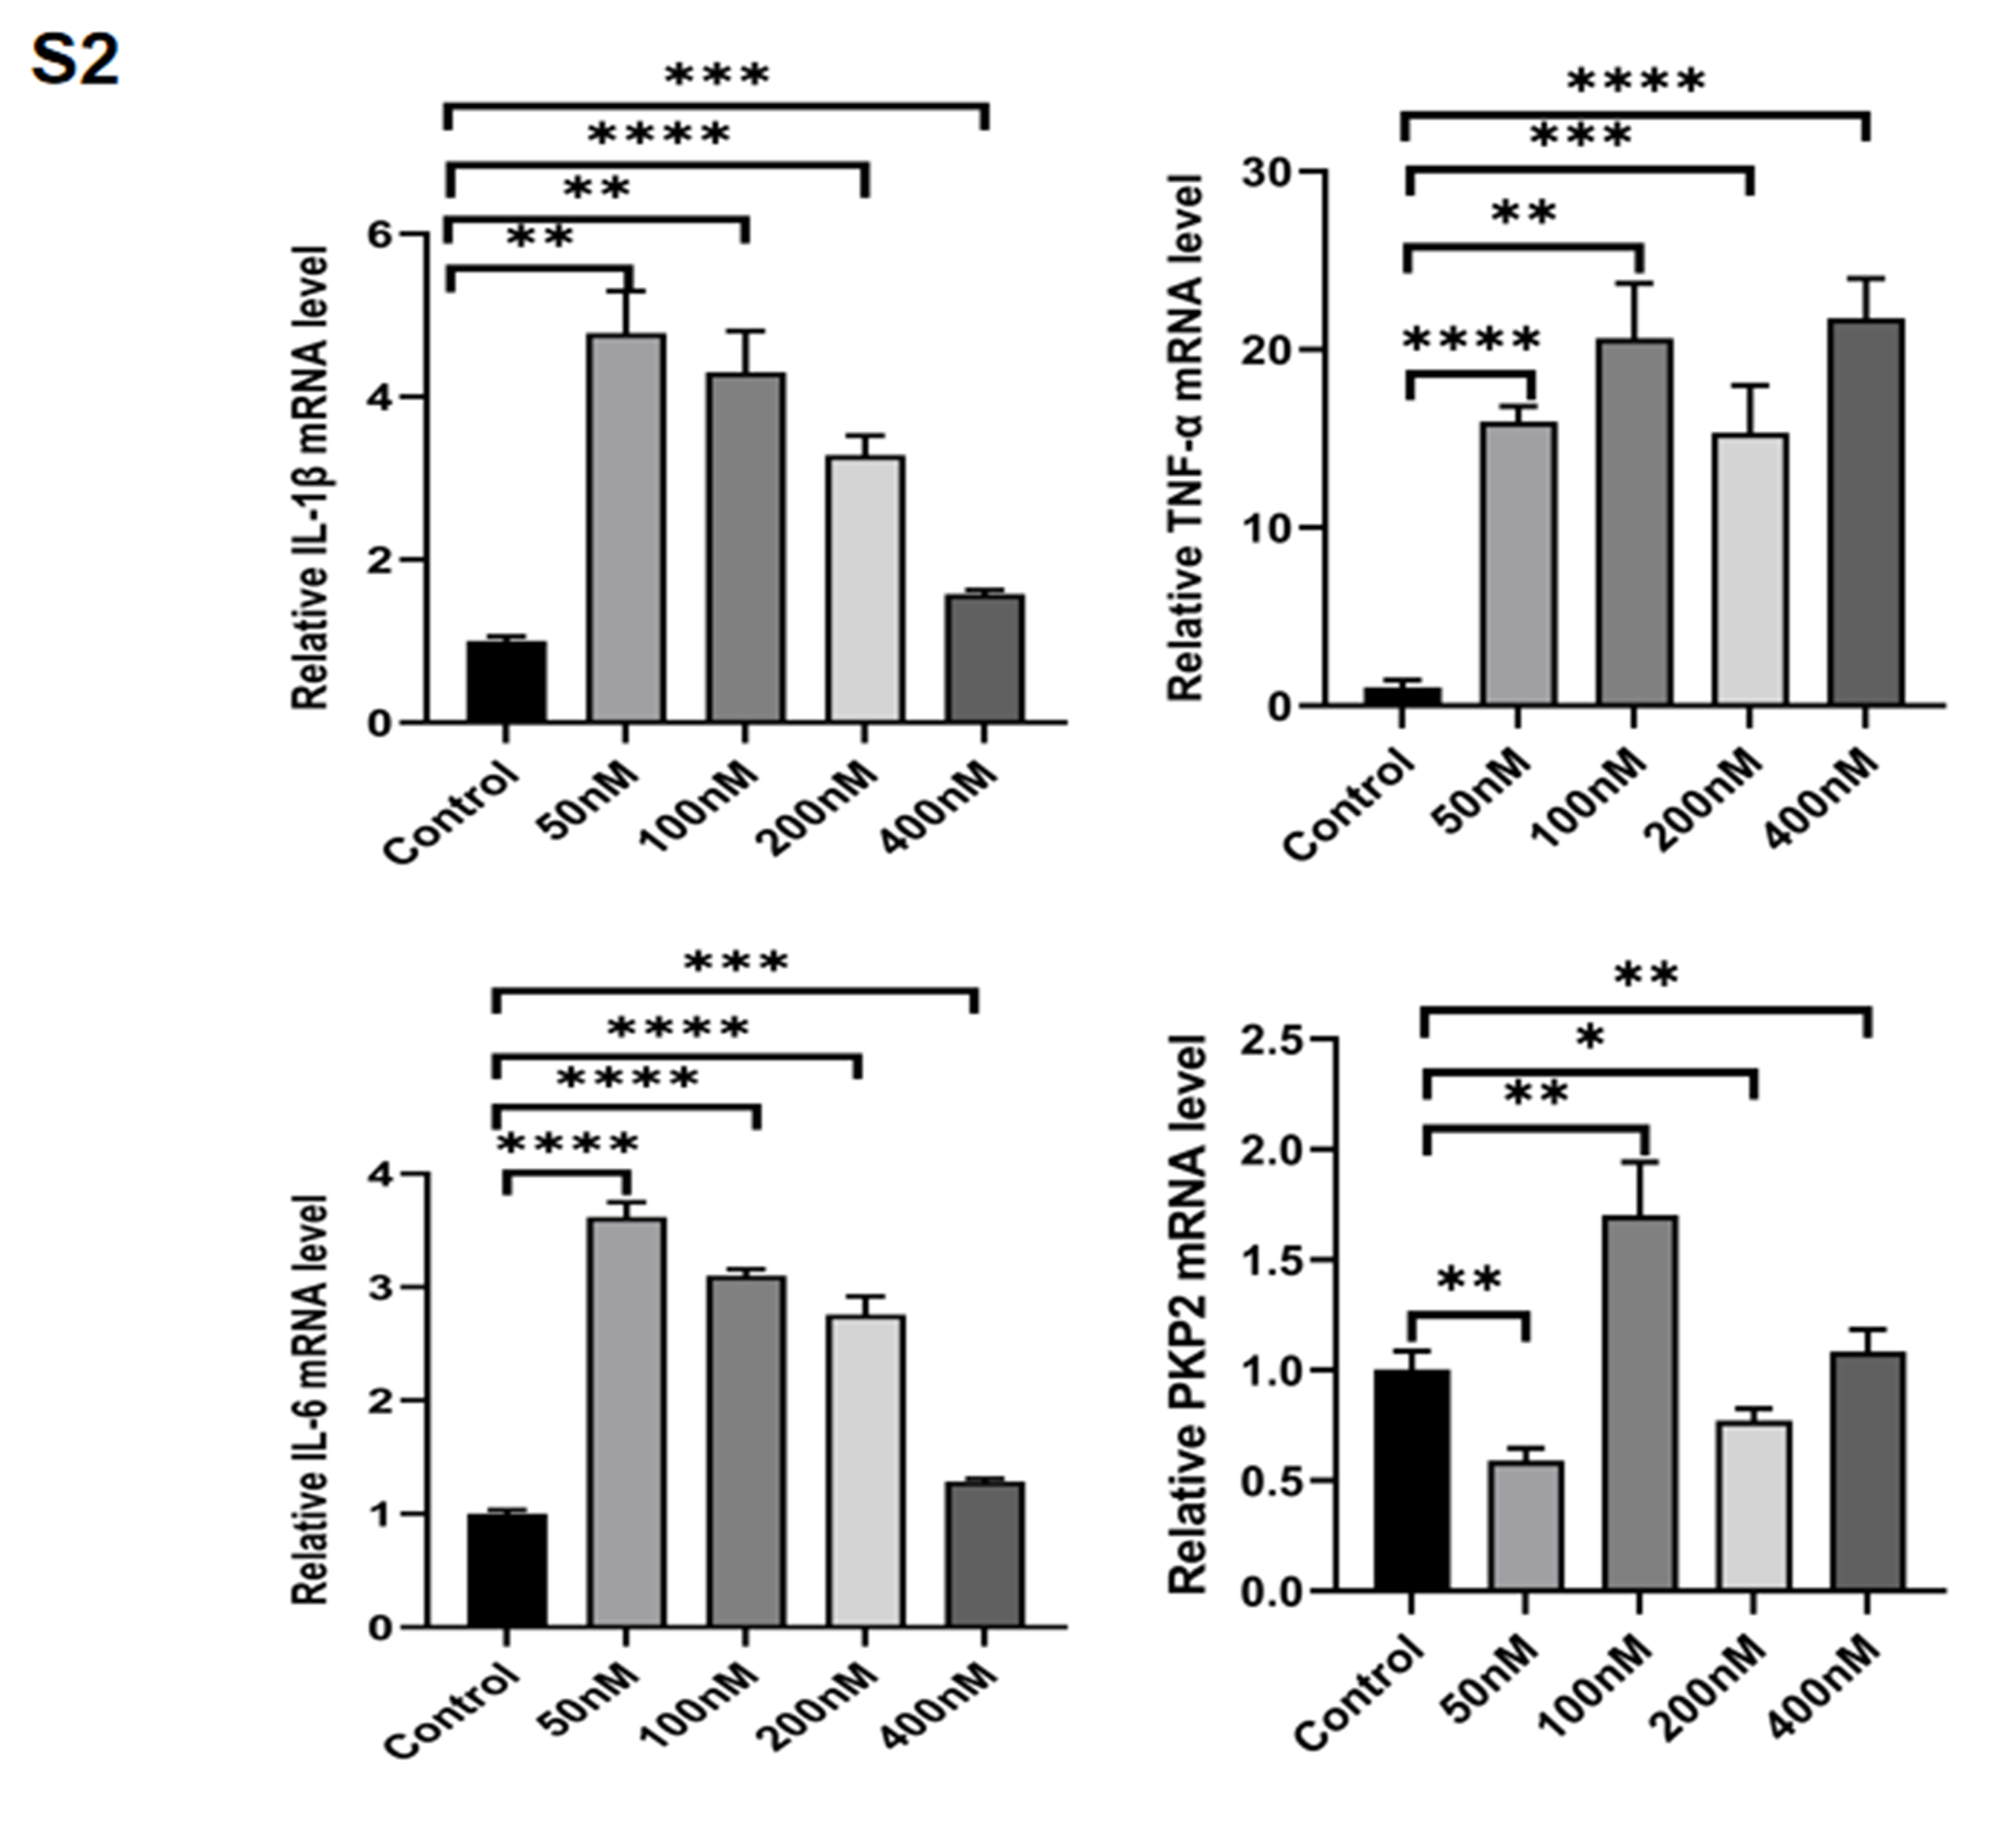


**Figure S2** The levels of inflammatory factors were elevated following stimulation of 266-6 cells with caerulein. The expression levels of IL-1β, TNF-α, IL-6 mRNA, and PKP2 in 266-6 cells from the control group, as well as those treated with concentrations of 50nM, 100nM, 200nM, and 400nM were assessed using qRT-PCR. GAPDH was utilized as an internal control (representative of three independent experiments).*p < 0.05,**p < 0.01,** p < 0.001,**** p <0 .0001.
